# Supplementary material for: Effects of isomorphic poly(butylene succinate-co-butylene fumarate) on the nucleation of poly(butylene succinate) and the formation of poly(butylene succinate) ring-banded spherulites
Source: Royal Society of Chemistry journal article supplement (doi:10.1039/c7ce02124k), 2018-01-01
Supplement: c7ce02124k1.pdf [file c7ce02124k1.pdf]

## Supporting Information

### Self-nucleation (SN) tests by using differential scanning calorimetry (DSC)

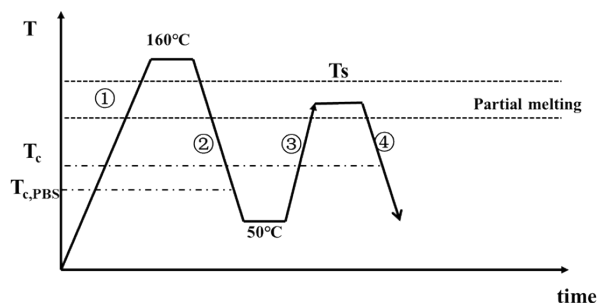

Figure S1. The procedures of SN tests by using DSC.

The total thermal treatment is mainly divided into four steps<sup>1</sup>, such as shown in Figure S1. Step ①: the samples were first heated to 160 °C and held at 160 °C for 3 min to erase the thermal history. Step ②: the samples were cooled to 50 °C. The peak temperature of the exotherm was taken as  $T_{c,PBS}$ . Step ③: a crucial step in the analysis process, which is carried by heating the samples to selected temperature ( $T_s$ ) for 3 min. The qualified  $T_s$  needs to meet certain condition: high enough to make PBS partly melt and low enough to make PBS form some stabilized crystal fragments to induce self-nucleation without annealing. Step ④: the final crystallization was cooled to 50 °C and the crystallization peak was taken as  $T_c$ . During the whole procedure, the heating rate and the cooling rate were both 10 °C /min and the sample was protected under a nitrogen atmosphere.

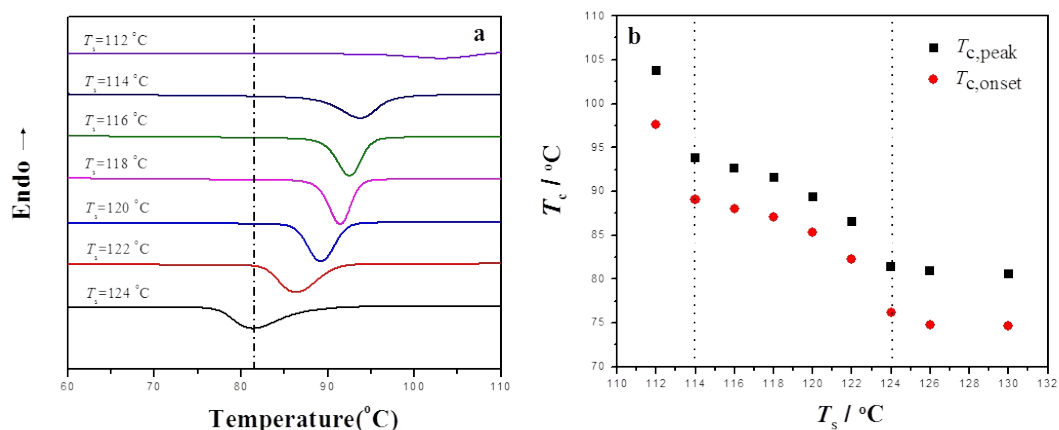

Figure S2. (a) Self-nucleation behavior of neat PBS to select the lowest  $T_s$ . (b) Variation of the  $T_c$  with  $T_s$  for PBS. The dashed lines correspond to changes in the self-nucleation domains.

Figure S2(a) shows the cooling curves of the neat PBS by using different  $T_s$ . When  $T_s$  is higher than 124 °C, the sample is completely melted and the obtained  $T_c$  is constant. When  $T_s$  is between 112 °C and 124 °C, an increased  $T_c$  can be obtained with the increase of  $T_s$ , indicating the improvement of the nucleation density of PBS. The ideal self-nucleation temperature is defined as the lowest  $T_s$  which can cause the maximum shift of  $T_c$ <sup>2</sup>. Figure S2(b) can be verified more clearly in the plot of the  $T_c$  versus  $T_s$ . For neat PBS here, the lowest  $T_s$  is selected as 114 °C, the  $T_{c,max}$  value is obtained as 93.8 °C.

## References

1. B. Fillon, A. Thierry, B. Lotz and J. C. Wittmann, *J. Therm. Anal.*, 1994, **42**, 721-731.
2. M. Trujillo, M. L. Arnal, A. J. Muller, M. A. Mujica, C. U. de Navarro, B. Ruelle and P. Dubois, *Polymer*, 2012, **53**, 832-841.

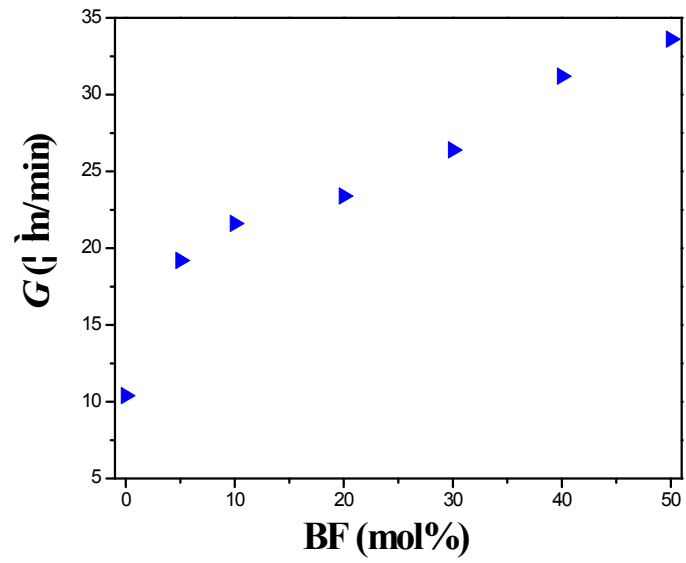

Figure S3. Spherulitic growth rates of PBSFs with different BF molar ratios isothermally crystallized at 96 °C.
